# Supplementary material
Source: Springer Nature journal article supplement (https://www.springermedizin.de/resource/supplementary/13054_2010_8830_MOESM3_ESM.pdf/9732670)

Mean rank

90  
80  
70  
60  
50  
40  
30  
20  
10  
0

**Sepsis group**

**Non-sepsis  
group**

**Control**

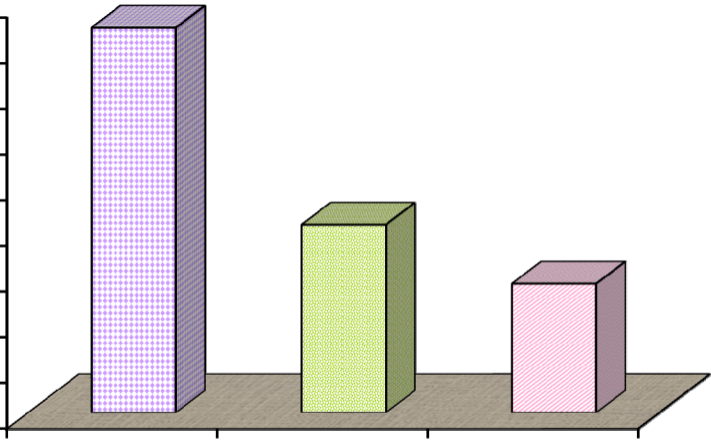

Supplement: MOESM3 [file 9732670]
